# Supplementary material
Source: publisher site journal article supplement (https://www.dovepress.com/article/232540)
Supplement: Supplementary file 1 [file get_supplementary_file.php]

**Figure S1. Study design diagram**

**
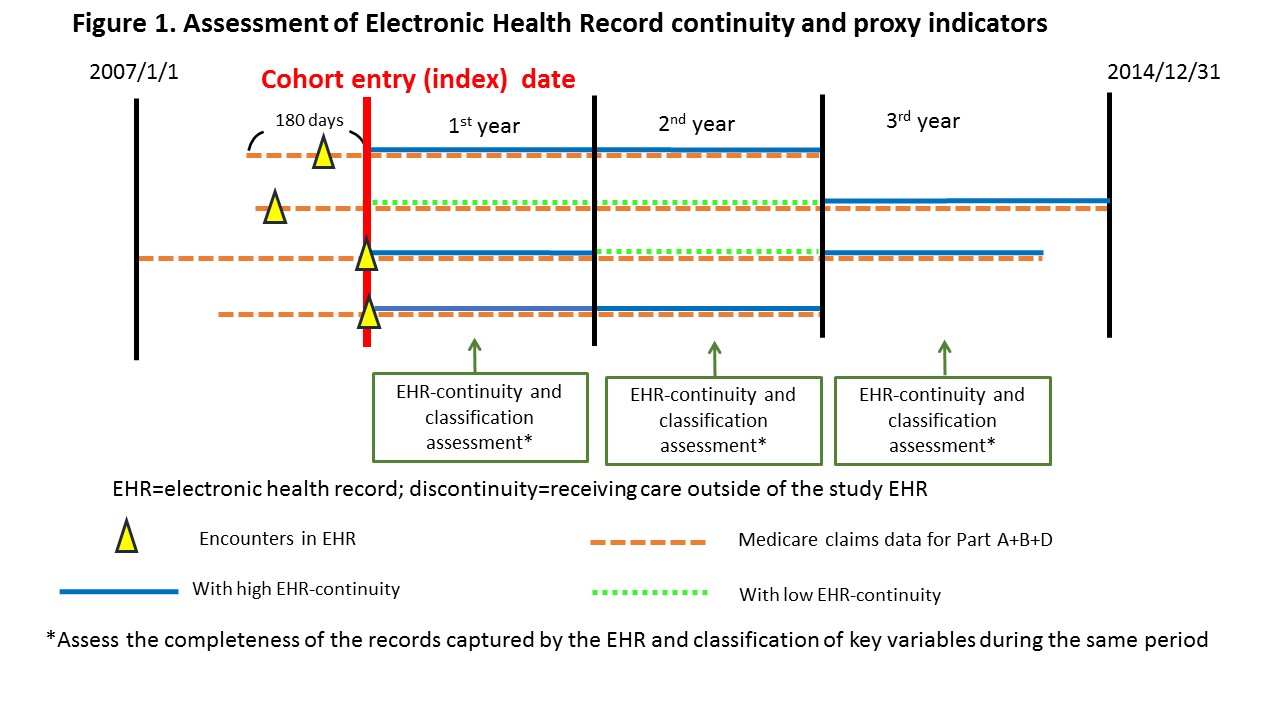
**

**Table S1. Prediction model for EHR data-continuity cohort**

| **Variable** | **Coefficient** |
| --- | --- |
| Intercept | -0.010 |
| Having seen the same provider twice | 0.049 |
| Having seen the same provider >=3 times | 0.087 |
| Having general medical exam* | 0.078 |
| Mammography* | 0.075 |
| Pap smear* | 0.009 |
| PSA Test* | 0.103 |
| Colonoscopy* | 0.064 |
| Fecal occult blood test* | 0.034 |
| Influenza vaccine* | 0.102 |
| Pneumococcal vaccine* | 0.031 |
| Having BMI recorded* | 0.017 |
| Having 2 of the above routine care facts** | 0.049 |
| With any one medication use record | 0.002 |
| With at least 2 medication use records | 0.074 |
| Having A1C ordered or value recorded* | 0.018 |
| Having at least one inpatient or outpatient encounter | 0.091 |
| Having at least two outpatient encounters | 0.050 |
| With 1 diagnosis recorded in the EHR | -0.026 |
| With at least 2 diagnoses recorded in the EHR | 0.037 |
| Having any ED visit in the EHR | 0.078 |
| ** having 2 of the facts followed by *, EHR=electronic health records, PSA= prostate specific antigen | |

**Table S2: The 40 patient characteristics to be assessed for accuracy of classification**

| 25 co-morbidity variables | 1. 15 variables commonly used as covariates for confounding adjustment: Dementia, atrial fibrillation, chronic lung disease, chronic liver disease, chronic kidney disease, cancer, diabetes, hypertension, anemia, psychosis, depression, pneumonia, HIV, fracture, and RA 2. 10 variables with validated algorithm commonly used as outcome variables: ischemic stroke, ICH, MI, AKI, hepatotoxicity, GI Bleeding, major bleeding, DVT, PE, and CHF11-13,14,15,16,17,18 |
| --- | --- |
| 15 medication use variables | antiplatelet agents, antidiabetics, antihypertensives, NSAIDs, opioids, antidepressants, antipsychotics, anticonvulsants, PPIs, antiarrhythmics, statins, dementia, hormone therapy, antibiotics, and oral anticoagulants |
| CHF= congestive heart failure, HIV= human immunodeficiency virus, RA=rheumatoid arthritis, AKI=acute kidney injury, ICH= intracranial hemorrhage, MI= myocardial infarction, PE= pulmonary embolism, DVT= deep vein thrombosis, NSAIDs= nonsteroidal anti-inflammatory drugs, PPI= Proton pump inhibitors | |

**Table S3. Patients population comparison between MA vs. NC sites**

| **Variable** | **Training (MA) set, n=80,588**  **N (%)** | **Validation (NC) set, n=33,207**  **N (%)** | **Absolute Standardized Mean Difference** |
| --- | --- | --- | --- |
| Mean (SD) age, years | 74.1 (7.7) | 73.7 (7.4) | 0.00 |
| Female | 60,217 (57.7) | 29,544 (60.0) | 0.05 |
| Mean (SD) CCS | 2.3 (3.3) | 2.0 (3.0) | 0.00 |
| Dementia | 11,776 (11.3) | 5,603 (11.4) | 0.00 |
| Atrial fibrillation | 19,144 (18.3) | 8,044 (16.3) | 0.05 |
| Chronic lung disease | 21,334 (20.4) | 11,347 (23.0) | 0.06 |
| Chronic liver disease | 8,119 (7.8) | 2,772 (5.6) | 0.09 |
| Chronic kidney disease | 14,524 (13.9) | 7,233 (14.7) | 0.02 |
| Cancer | 44,980 (43.1) | 19,628 (39.8) | 0.07 |
| Diabetes | 23,074 (22.1) | 13,993 (28.4) | 0.15 |
| Hypertension | 84,184 (80.6) | 41,402 (84.0) | 0.09 |
| Anemia | 30,455 (29.2) | 14,825 (30.1) | 0.02 |
| Psychosis | 5,201 (5.0) | 2,142 (4.4) | 0.03 |
| Depression | 21,085 (20.2) | 8,717 (17.7) | 0.06 |
| Pneumonia | 11,438 (11.0) | 5,336 (10.8) | 0.00 |
| HIV | 147 (0.1) | 77 (0.2) | 0.01 |
| Fracture | 3,569 (3.4) | 1,699 (3.5) | 0.00 |
| RA | 2,775 (2.7) | 1,680 (3.4) | 0.04 |
| Ischemic stroke | 1,127 (1.1) | 675 (1.4) | 0.03 |
| ICH* | 592 (0.6) | 238 (0.5) | 0.01 |
| MI* | 1,107 (1.1) | 517 (1.1) | 0.00 |
| AKI* | 5,941 (5.7) | 2,964 (6.0) | 0.01 |
| Hepatotoxicity* | 346 (0.3) | 153 (0.3) | 0.00 |
| GI Bleeding* | 2,001 (1.9) | 1,100 (2.2) | 0.02 |
| Major bleeding* | 4,644 (4.5) | 3,015 (6.1) | 0.07 |
| DVT* | 958 (0.9) | 428 (0.9) | 0.01 |
| PE* | 660 (0.6) | 368 (0.8) | 0.01 |
| CHF* | 11,701 (11.2) | 5,342 (10.8) | 0.01 |
| EHR= electronic health record, stand. Diff. = standardized difference, CHF= congestive heart failure, HIV= human immunodeficiency virus, RA=rheumatoid arthritis, AKI=acute kidney injury, ICH= intracranial hemorrhage, MI= myocardial infarction, PE= pulmonary embolism, DVT= deep vein thrombosis, NSAIDs= nonsteroidal anti-inflammatory drugs, PPI= Proton pump inhibitors. * Variables based on validated algorithms commonly used to define study outcomes11-13,14,15,16,17,18. | | | |

**Table S4. Correlation between predicted vs. observed EHR data-continuity measured by Spearman coefficients**

| Dataset | Training (MA) set | Validation set (NC) |
| --- | --- | --- |
| Overall population | 0.78 | 0.73 |
| Age groups |  |  |
| 65-<75 | 0.78 | 0.72 |
| 75-<85 | 0.79 | 0.73 |
| >=85 | 0.76 | 0.73 |
| Gender |  |  |
| female | 0.78 | 0.74 |
| male | 0.77 | 0.72 |
| Ethnicity |  |  |
| white | 0.76 | 0.73 |
| black | 0.76 | 0.70 |
| others | 0.82 | 0.75 |
| CCS |  |  |
| <=0 | 0.76 | 0.74 |
| 1-2 | 0.78 | 0.76 |
| >=2 | 0.78 | 0.73 |
| CCS= combined comorbidity score (J Clin Epidemiol. 2011;64 [7]:749-759). The higher the score, the higher the mortality. | | |

**Table S5-1. Representativeness of the EHR data-continuity cohort in the training (MA) set**

|  | Low EHR data-continuity N (%)* | High EHR data-continuity N (%)** | Stand. Diff.*** |
| --- | --- | --- | --- |
| Mean age (SD) | 74.1 (7.6) | 72.7 (7.2) | 0.18 |
| Female, % | 55,119 (58.6) | 12,804 (56.1) | 0.05 |
| Dementia | 10,916 (11.6) | 1,772 (7.8) | 0.13 |
| Atrial fibrillation | 17,305 (18.4) | 3,689 (16.2) | 0.06 |
| Chronic lung disease | 18,937 (20.1) | 4,512 (19.8) | 0.01 |
| Liver disease | 6,925 (7.4) | 1,992 (8.7) | 0.05 |
| Chronic kidney disease | 12,286 (13.1) | 3,385 (14.8) | 0.05 |
| Cancer | 40,593 (43.1) | 10,001 (43.8) | 0.01 |
| Diabetes | 19,696 (20.9) | 5,427 (23.8) | 0.07 |
| Hypertension | 73,727 (78.3) | 18,695 (81.9) | 0.09 |
| Anemia | 27,218 (28.9) | 6,274 (27.5) | 0.03 |
| Psychosis | 4,676 (5.0) | 914 (4.0) | 0.05 |
| Depression | 18,684 (19.9) | 4,741 (20.8) | 0.02 |
| Pneumonia | 10,012 (10.6) | 2,379 (10.4) | 0.01 |
| HIV | 103 (0.1) | 55 (0.2) | 0.03 |
| Fracture | 3,204 (3.4) | 670 (2.9) | 0.03 |
| RA | 2,572 (2.7) | 686 (3.0) | 0.02 |
| Ischemic stroke | 5,043 (5.4) | 1,061 (4.7) | 0.03 |
| ICH | 1,995 (2.1) | 394 (1.7) | 0.03 |
| MI | 842 (0.9) | 238 (1.0) | 0.02 |
| AKI | 5,164 (5.5) | 1,375 (6.0) | 0.02 |
| Hepatotoxicity | 1,010 (1.1) | 377 (1.7) | 0.05 |
| GI bleeding | 6,506 (6.9) | 1,674 (7.3) | 0.02 |
| Major bleeding | 12,345 (13.1) | 3,272 (14.3) | 0.04 |
| DVT | 4,256 (4.5) | 1,066 (4.7) | 0.01 |
| PE | 1,802 (1.9) | 491 (2.2) | 0.02 |
| CHF | 10,288 (10.9) | 2,343 (10.3) | 0.02 |
| *Patients in the lower 8 deciles of predicted EHR data-continuity;  **Patients in the top 2 deciles of predicted EHR data-continuity  ***Stand diff= Standardized difference.  CHF= congestive heart failure, HIV= human immunodeficiency virus, RA=rheumatoid arthritis, AKI=acute kidney injury, ICH= intracranial hemorrhage, MI= myocardial infarction, PE= pulmonary embolism, DVT= deep vein thrombosis, NSAIDs= nonsteroidal anti-inflammatory drugs, PPI= Proton pump inhibitors | | | |

**Table S5-2. Representativeness of the EHR data-continuity cohort in NC dataset**

|  | Low EHR data-continuity N (%)* | High EHR data-continuity N (%)** | Stand. Diff.*** |
| --- | --- | --- | --- |
| Mean age (SD) | 73.9 (7.4) | 72.8 (7.1) | 0.16 |
| Female, % | 25,333 (60.3) | 4,211 (57.7) | 0.05 |
| Dementia | 4,743 (11.3) | 725 (9.9) | 0.04 |
| Atrial fibrillation | 6,649 (15.8) | 1,280 (17.5) | 0.05 |
| Chronic lung disease | 9,440 (22.5) | 1,682 (23.1) | 0.01 |
| Liver disease | 2,144 (5.1) | 500 (6.9) | 0.07 |
| Chronic kidney disease | 5,704 (13.6) | 1,327 (18.2) | 0.13 |
| Cancer | 16,201 (38.6) | 2,951 (40.4) | 0.04 |
| Diabetes | 11,287 (26.9) | 2,537 (34.8) | 0.17 |
| Hypertension | 34,527 (82.2) | 6,264 (85.8) | 0.10 |
| Anemia | 11,894 (28.3) | 2,553 (35.0) | 0.14 |
| Psychosis | 1,741 (4.1) | 303 (4.2) | 0.00 |
| Depression | 7,008 (16.7) | 1,383 (19.0) | 0.06 |
| Pneumonia | 4,334 (10.3) | 858 (11.8) | 0.05 |
| HIV | 33 (0.1) | 38 (0.5) | 0.08 |
| Fracture | 1,378 (3.3) | 282 (3.9) | 0.03 |
| RA | 1,392 (3.3) | 266 (3.6) | 0.02 |
| Ischemic stroke | 524 (1.2) | 138 (1.9) | 0.05 |
| ICH | 182 (0.4) | 48 (0.7) | 0.03 |
| MI | 364 (0.9) | 119 (1.6) | 0.07 |
| AKI | 2,208 (5.3) | 684 (9.4) | 0.16 |
| Hepatotoxicity | 118 (0.3) | 28 (0.4) | 0.02 |
| GI bleeding | 810 (1.9) | 254 (3.5) | 0.10 |
| Major bleeding | 2,097 (5.0) | 833 (11.4) | 0.24 |
| DVT | 319 (0.8) | 99 (1.4) | 0.06 |
| PE | 280 (0.7) | 82 (1.1) | 0.05 |
| CHF | 4,342 (10.3) | 932 (12.8) | 0.08 |
| *Patients in the lower 8 deciles of predicted EHR data-continuity;  **Patients in the top 2 deciles of predicted EHR data-continuity  ***Stand diff= Standardized difference.  CHF= congestive heart failure, HIV= human immunodeficiency virus, RA=rheumatoid arthritis, AKI=acute kidney injury, ICH= intracranial hemorrhage, MI= myocardial infarction, PE= pulmonary embolism, DVT= deep vein thrombosis, NSAIDs= nonsteroidal anti-inflammatory drugs, PPI= Proton pump inhibitors | | | |

**Table S6. Representative assessment: discrepancy* of a comorbidity score** category in patients with high vs. low care-continuity**

| Year after cohort entry: | 1 | 2 | 3 | 4 | 5 | 6 | 7 |
| --- | --- | --- | --- | --- | --- | --- | --- |
| MA | | | | | | | |
| Top decile vs. the rest, training set | 0.01 | 0.02 | 0.02 | 0.02 | 0.02 | 0.03 | 0.04 |
| Top two deciles vs. the rest, training set | 0.02 | 0.02 | 0.02 | 0.02 | 0.02 | 0.02 | 0.02 |
| NC | | | | | | | |
| Top decile vs. the rest, validation set | 0.06 | 0.05 | 0.05 | 0.04 | 0.03 | 0.03 | 0.03 |
| Top two deciles vs. the rest, validation set | 0.05 | 0.04 | 0.04 | 0.04 | 0.03 | 0.03 | 0.03 |
| * Quantified by mean standardized difference (MSD); a MSD of <0.1 indicates acceptable discrepancy  **combined comorbidity score [*J Clin Epidemiol.* 2011;64(7):749-759.] | | | | | | | |
